# Supplementary material
Source: PubMed Central journal article supplement (PMC3173788)

Fig 1E

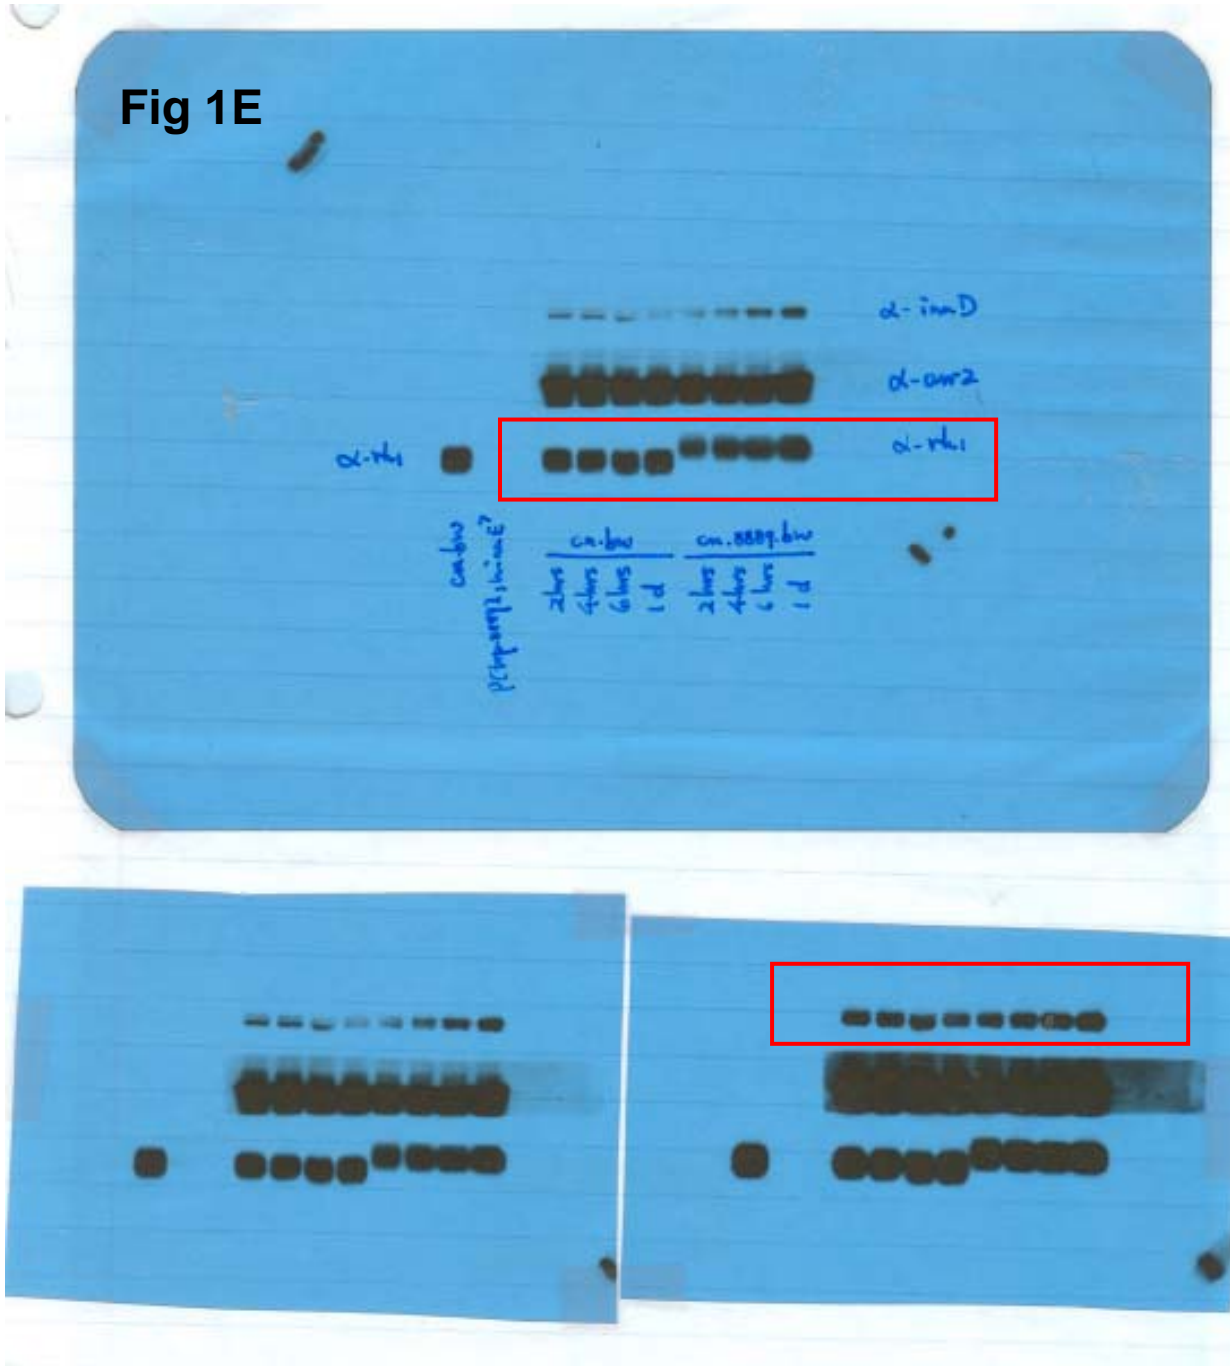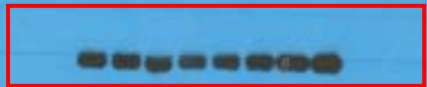

Fig 1F

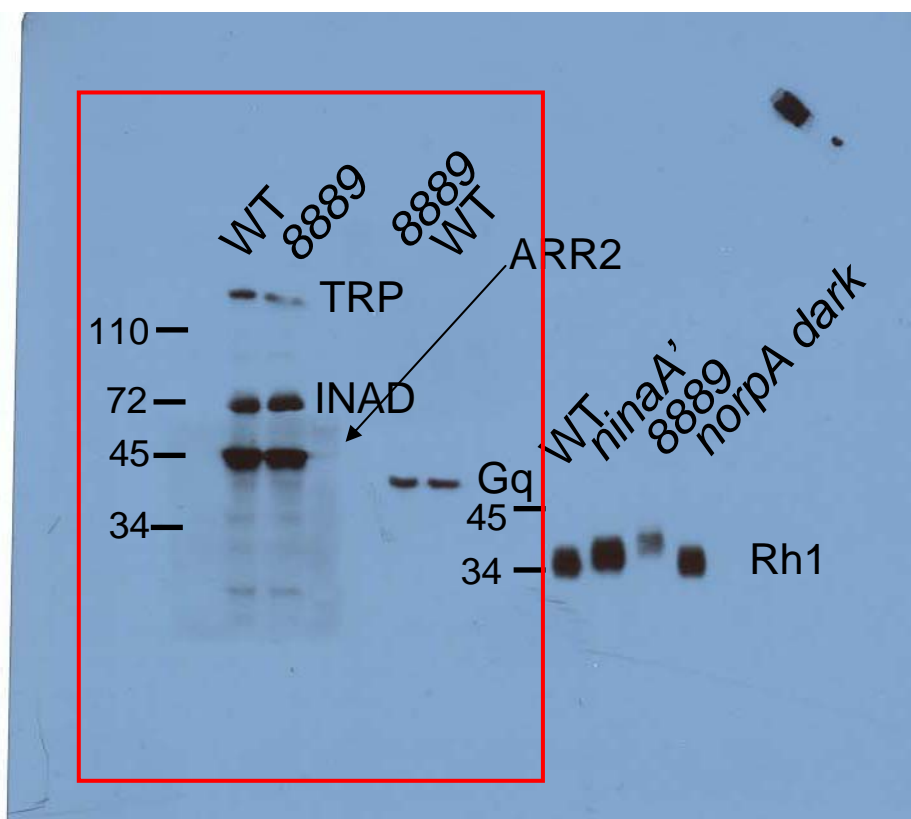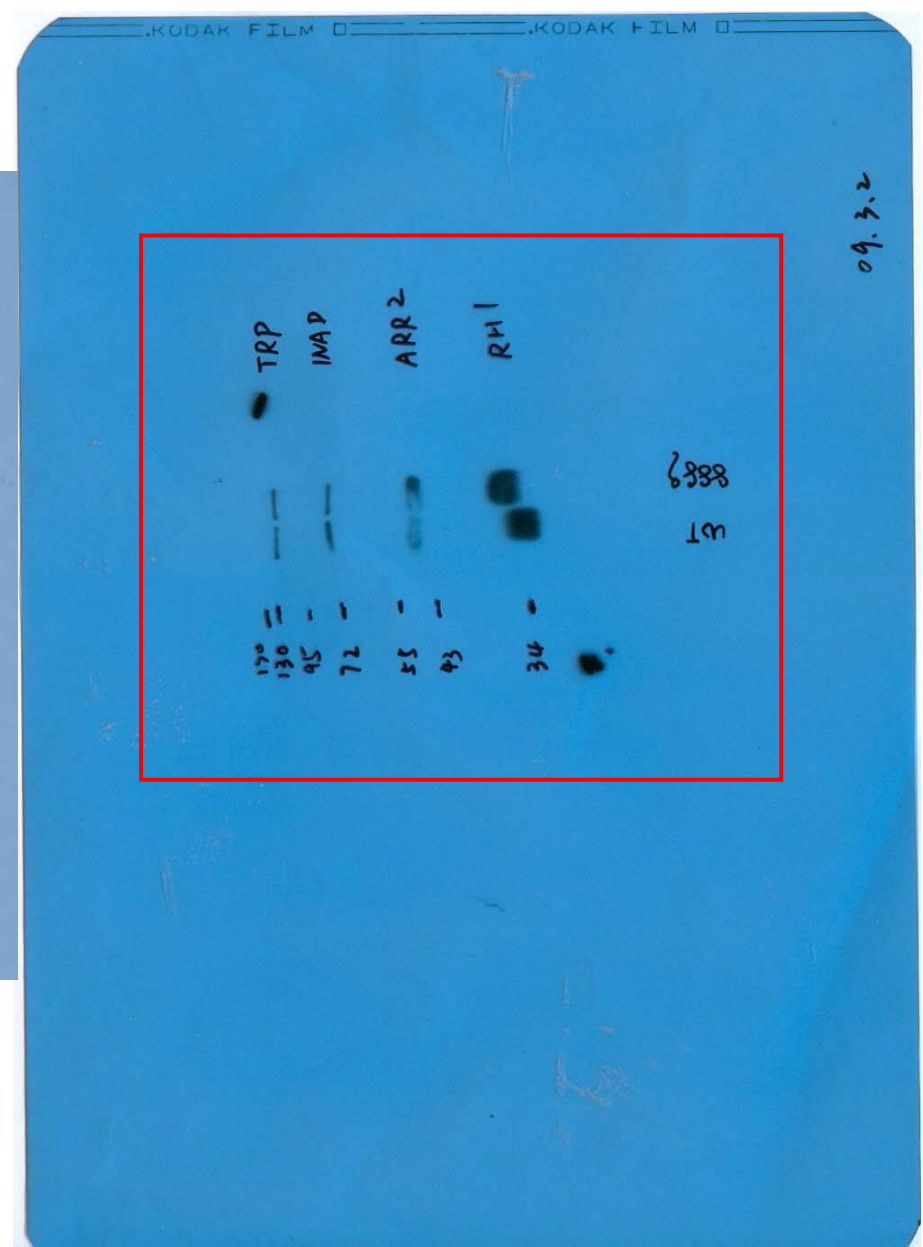



Fig 2B

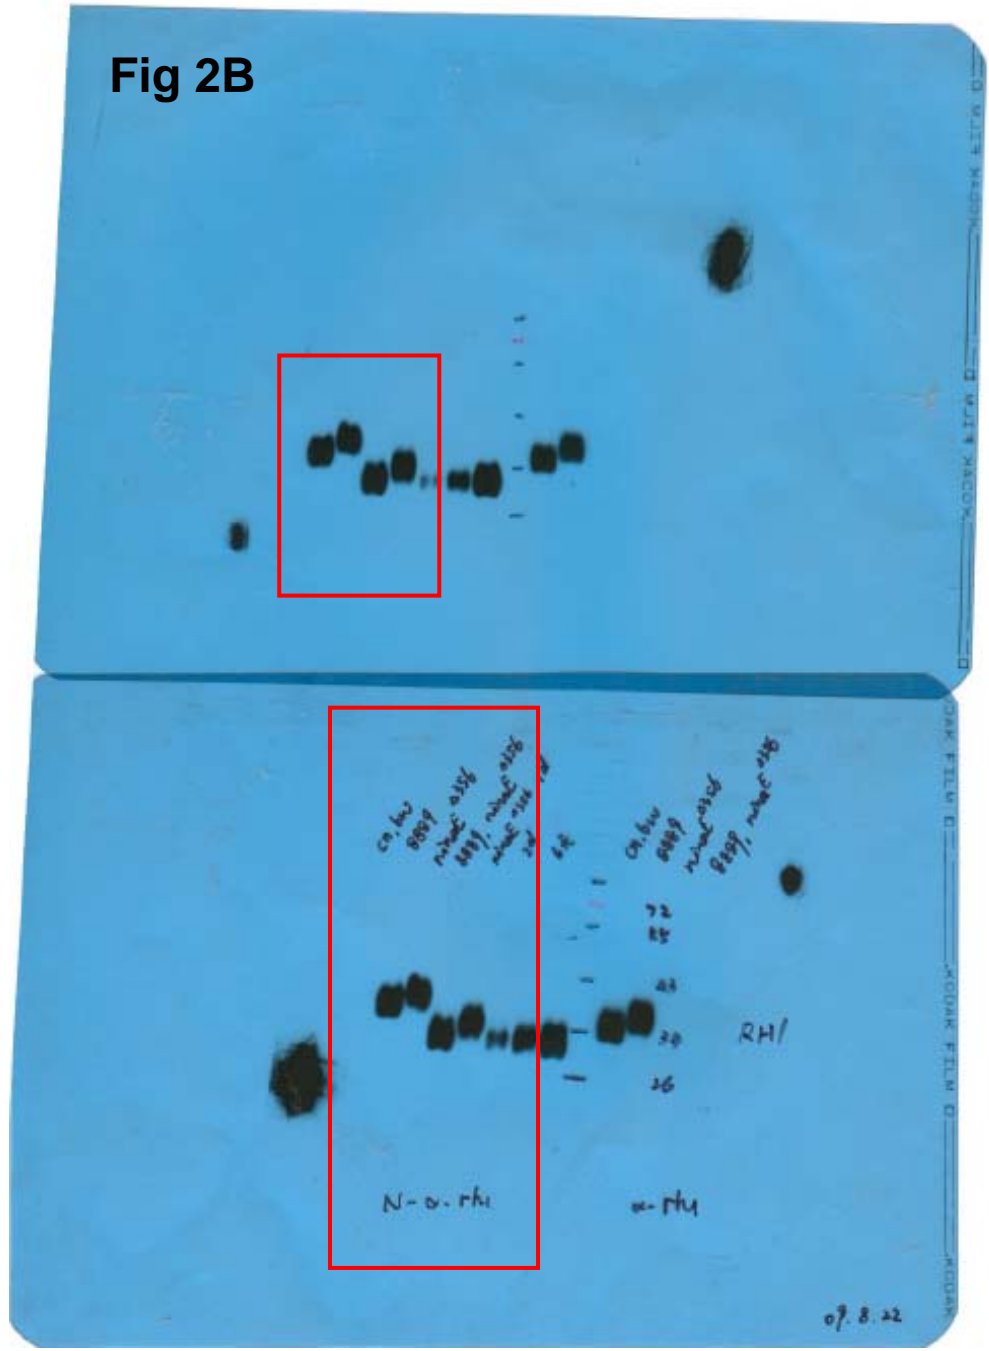

Ca, low  
8899  
rhac, 0.15g  
8899, rhac, 0.15g  
rhac, 0.15g

Ca, low  
8899  
rhac, 0.15g  
8899, rhac, 0.15g

N-α-rhi

α-rhi

RH/

07.8.22

Fig 2C

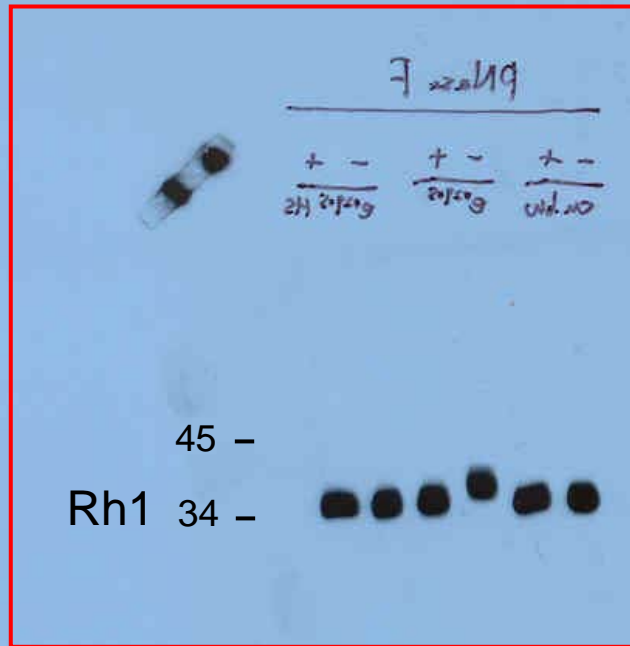

Fig 2D

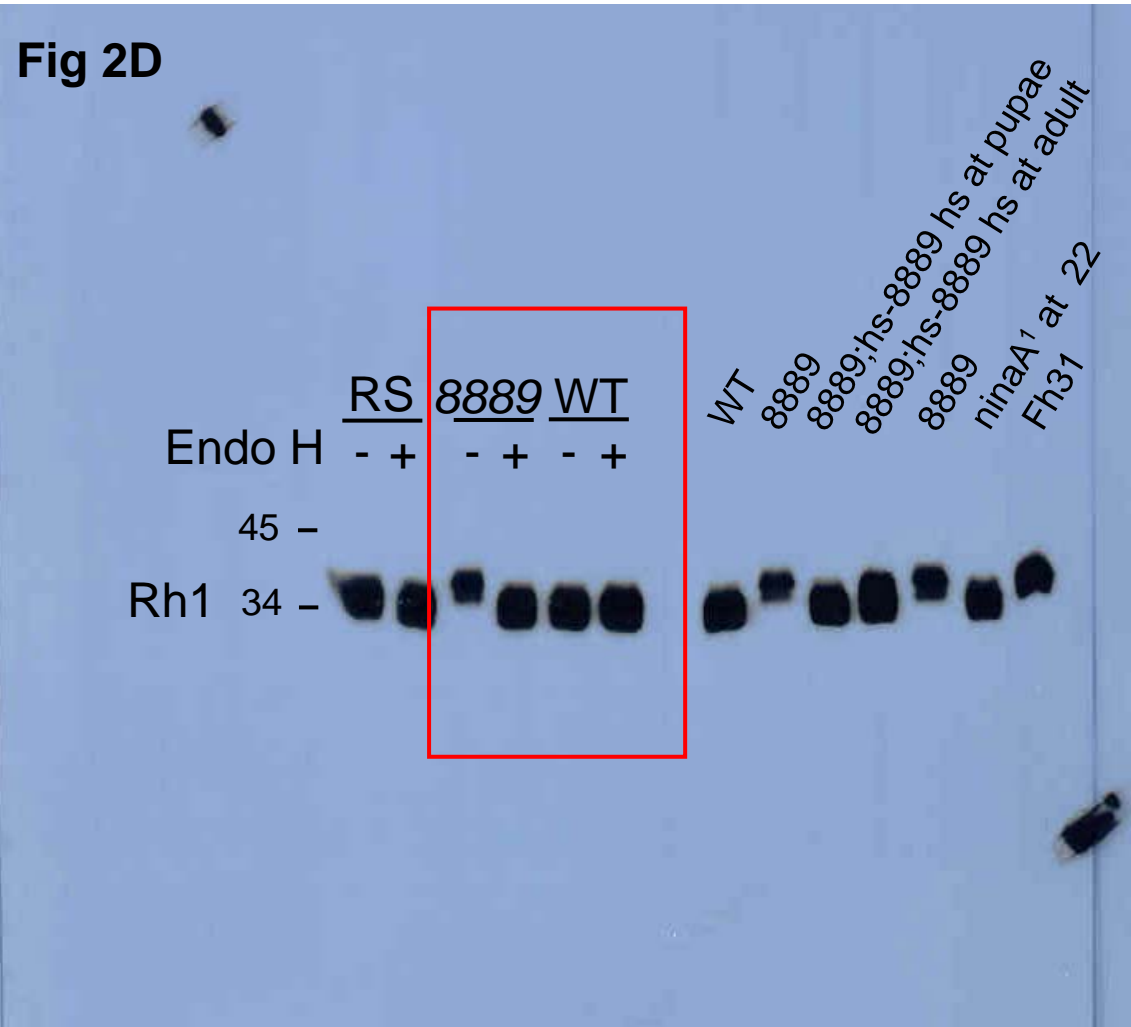

**Fig 3A**

Loading amount

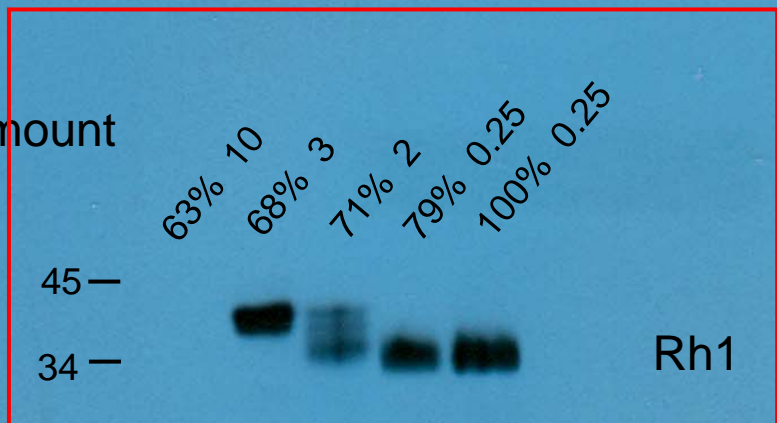

-----

45 —  
34 —

63% 10  
68% 5  
74% 3  
79% 0.5  
100% 0.5

Rh1

Loading amount

KODAK FILM D  
KODAK FILM D

Fig 3B

Loading amount

10 3 2 0.25 0.25

34

Rh1

63% 68% 73% 79% 100%

8889 Rh1时间

10.12.2

KODAK E1G W

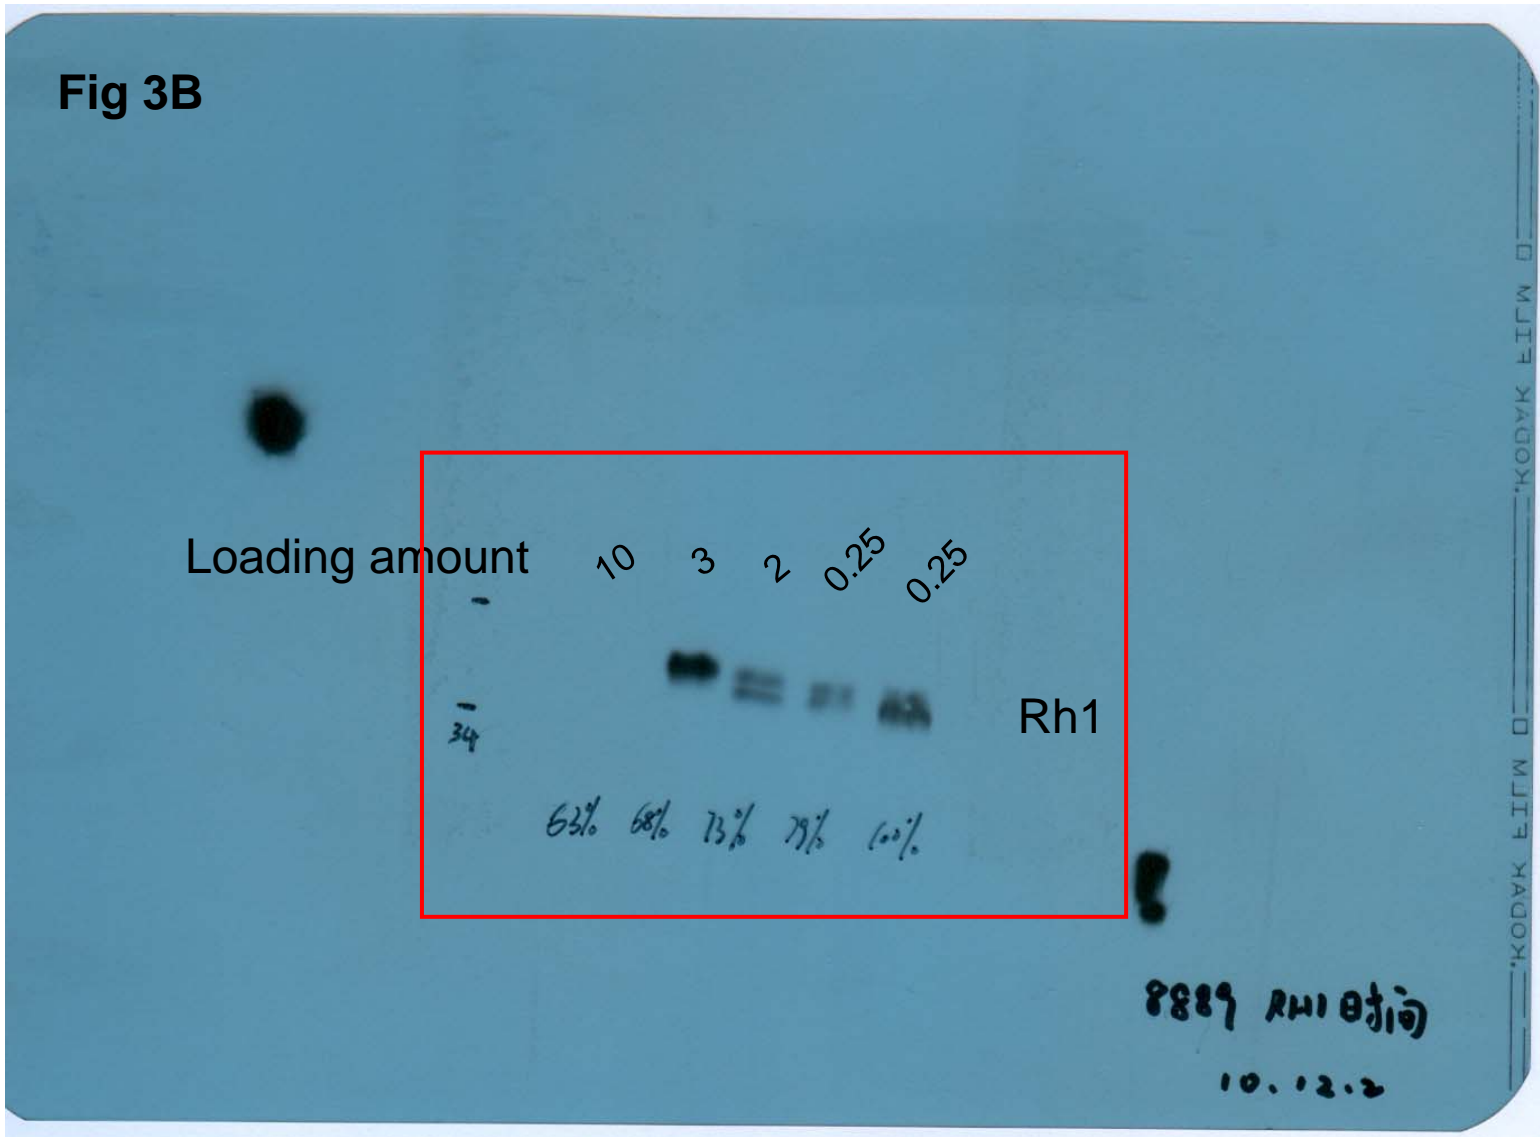

Fig 3G

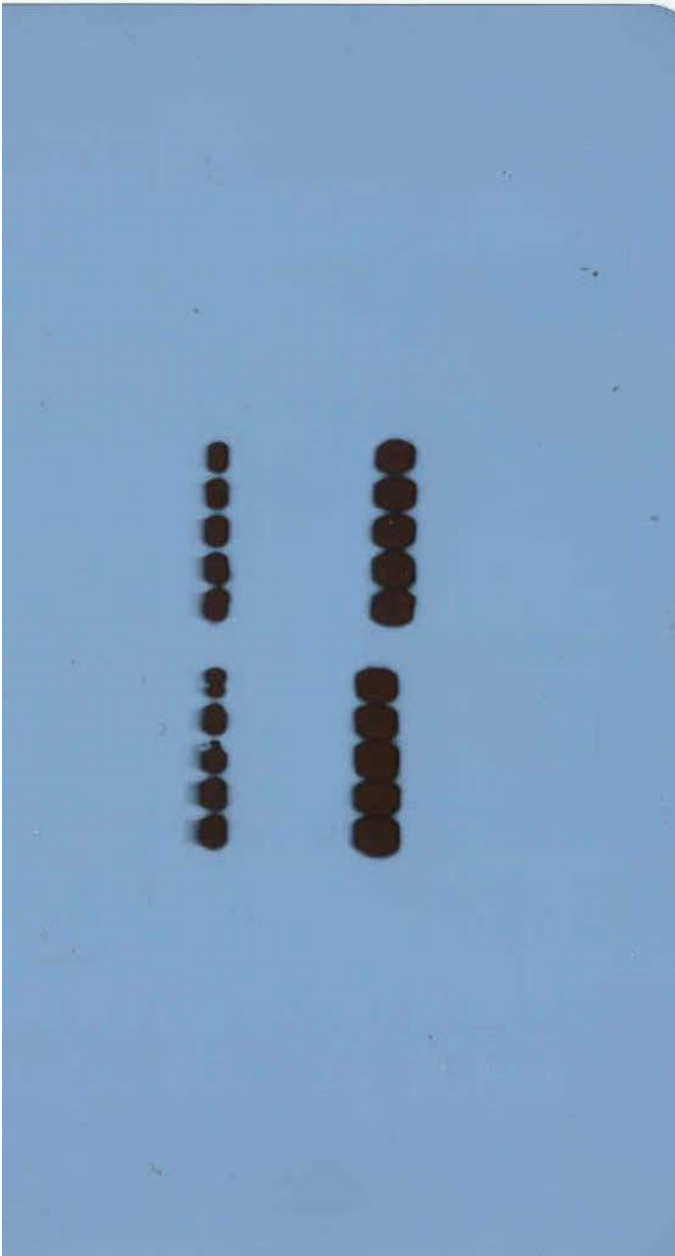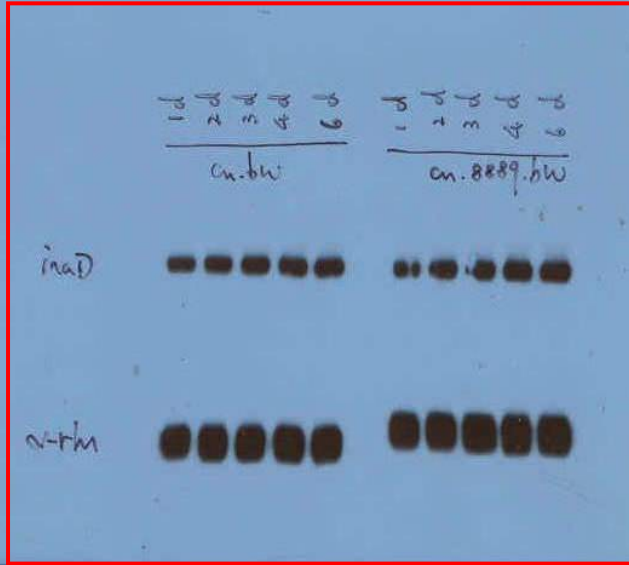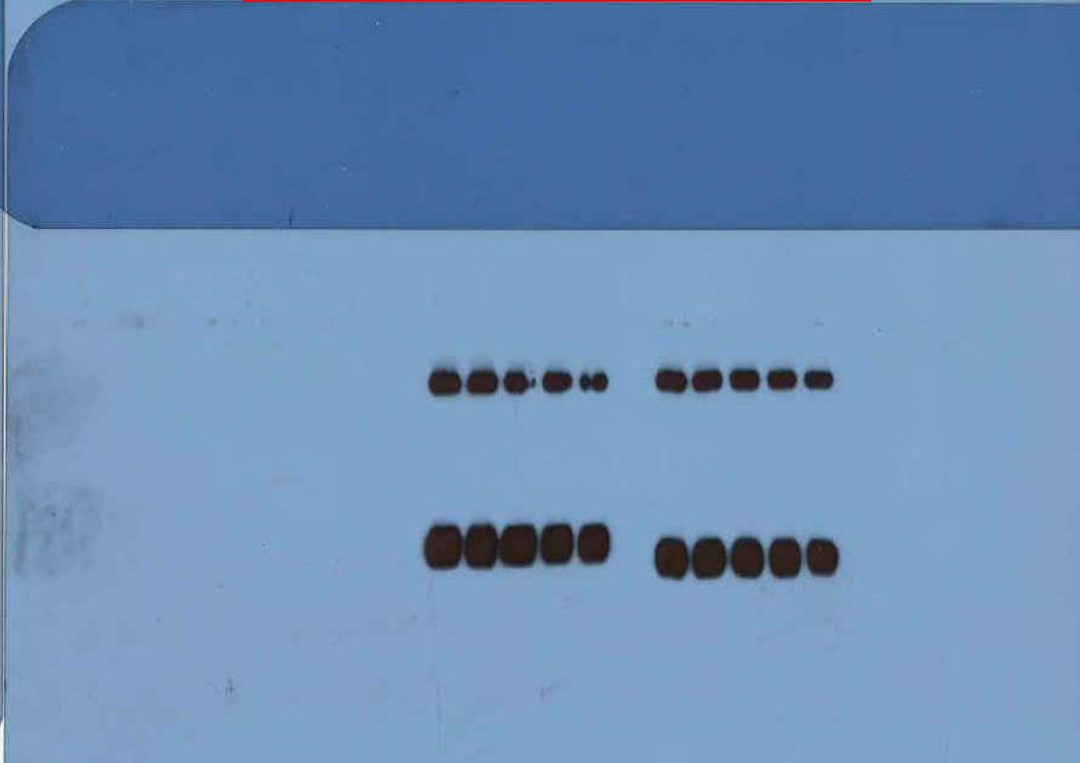



1  
2  
3  
4  
5  
6  
7  
8  
9  
10  
11  
12  
13  
14  
15  
16  
17  
18  
19  
20  
21  
22  
23  
24  
25  
26  
27  
28  
29  
30  
31  
32  
33  
34  
35  
36  
37  
38  
39  
40  
41  
42  
43  
44  
45  
46  
47  
48  
49  
50  
51  
52  
53  
54  
55  
56  
57  
58  
59  
60  
61  
62  
63  
64  
65  
66  
67  
68  
69  
70  
71  
72  
73  
74  
75  
76  
77  
78  
79  
80  
81  
82  
83  
84  
85  
86  
87  
88  
89  
90  
91  
92  
93  
94  
95  
96  
97  
98  
99  
100

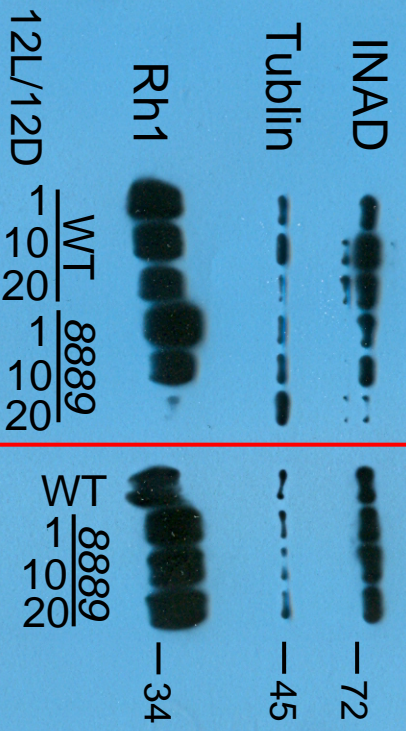

Fig 4B

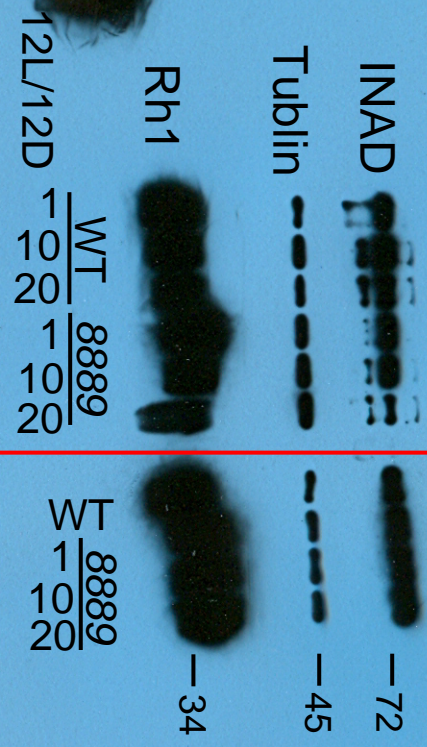



Fig 5A

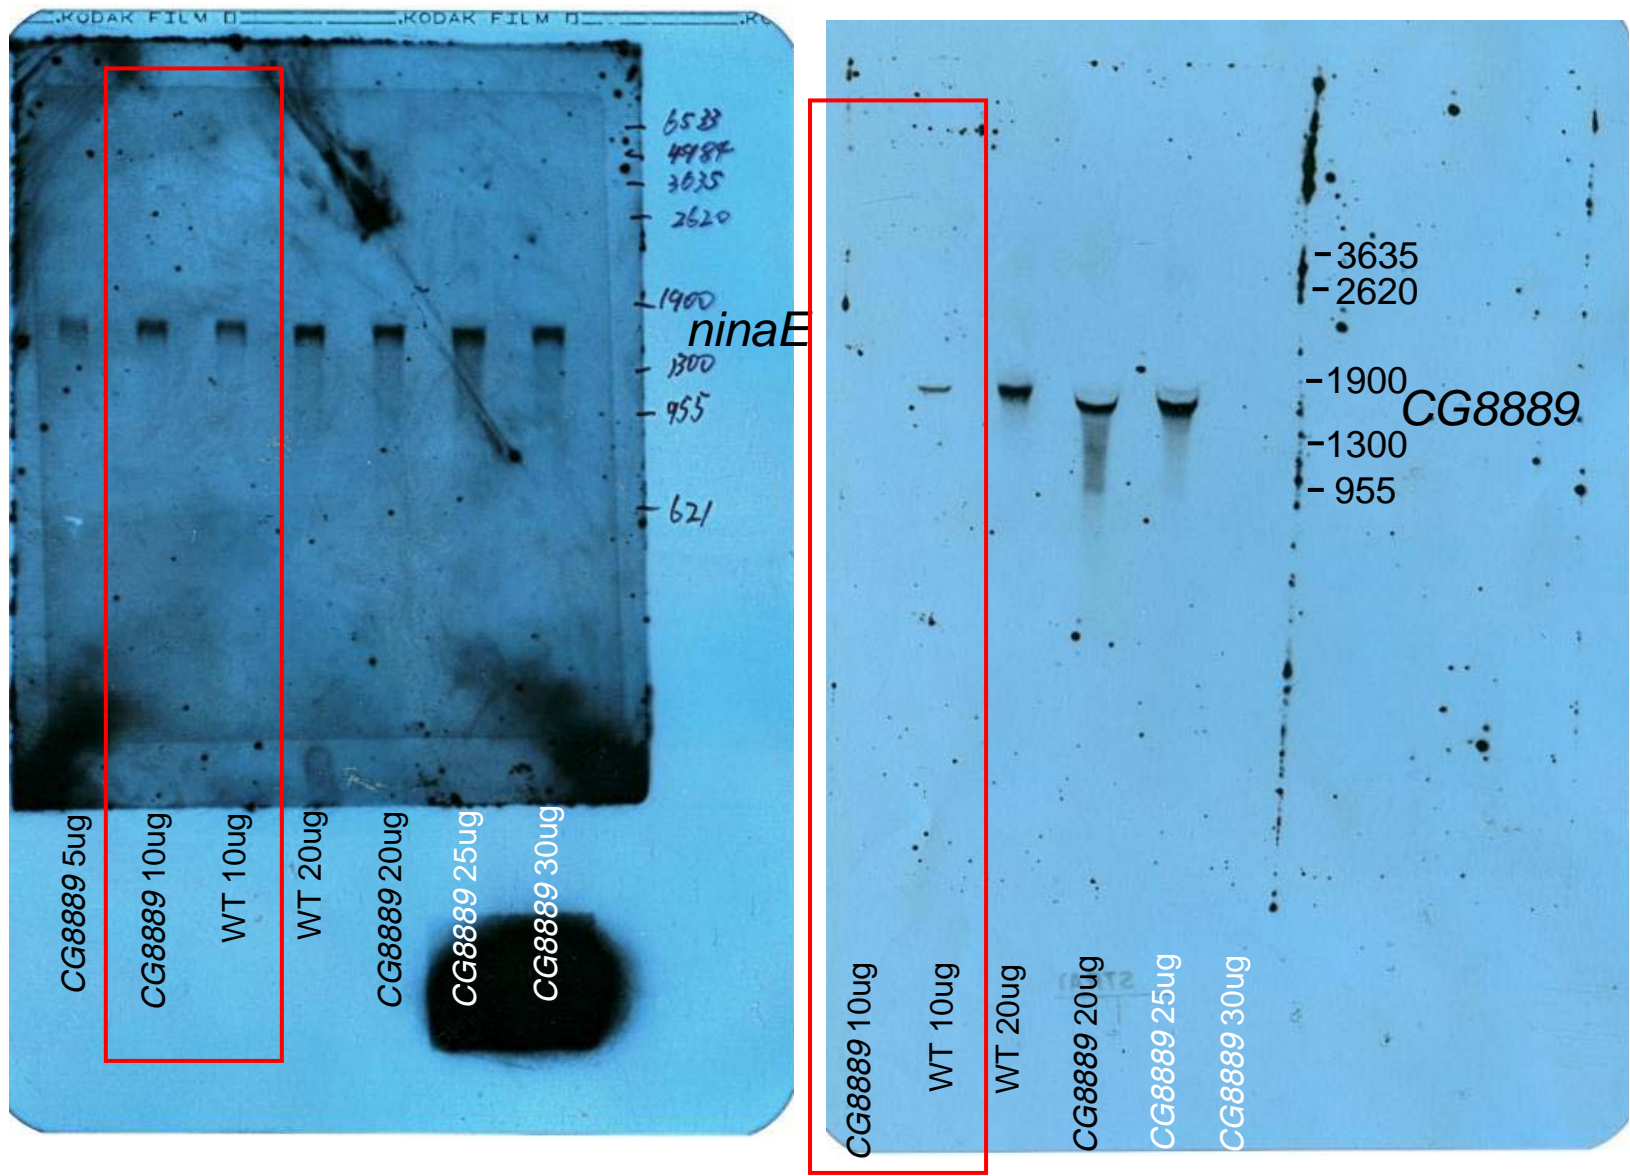

Fig 5C

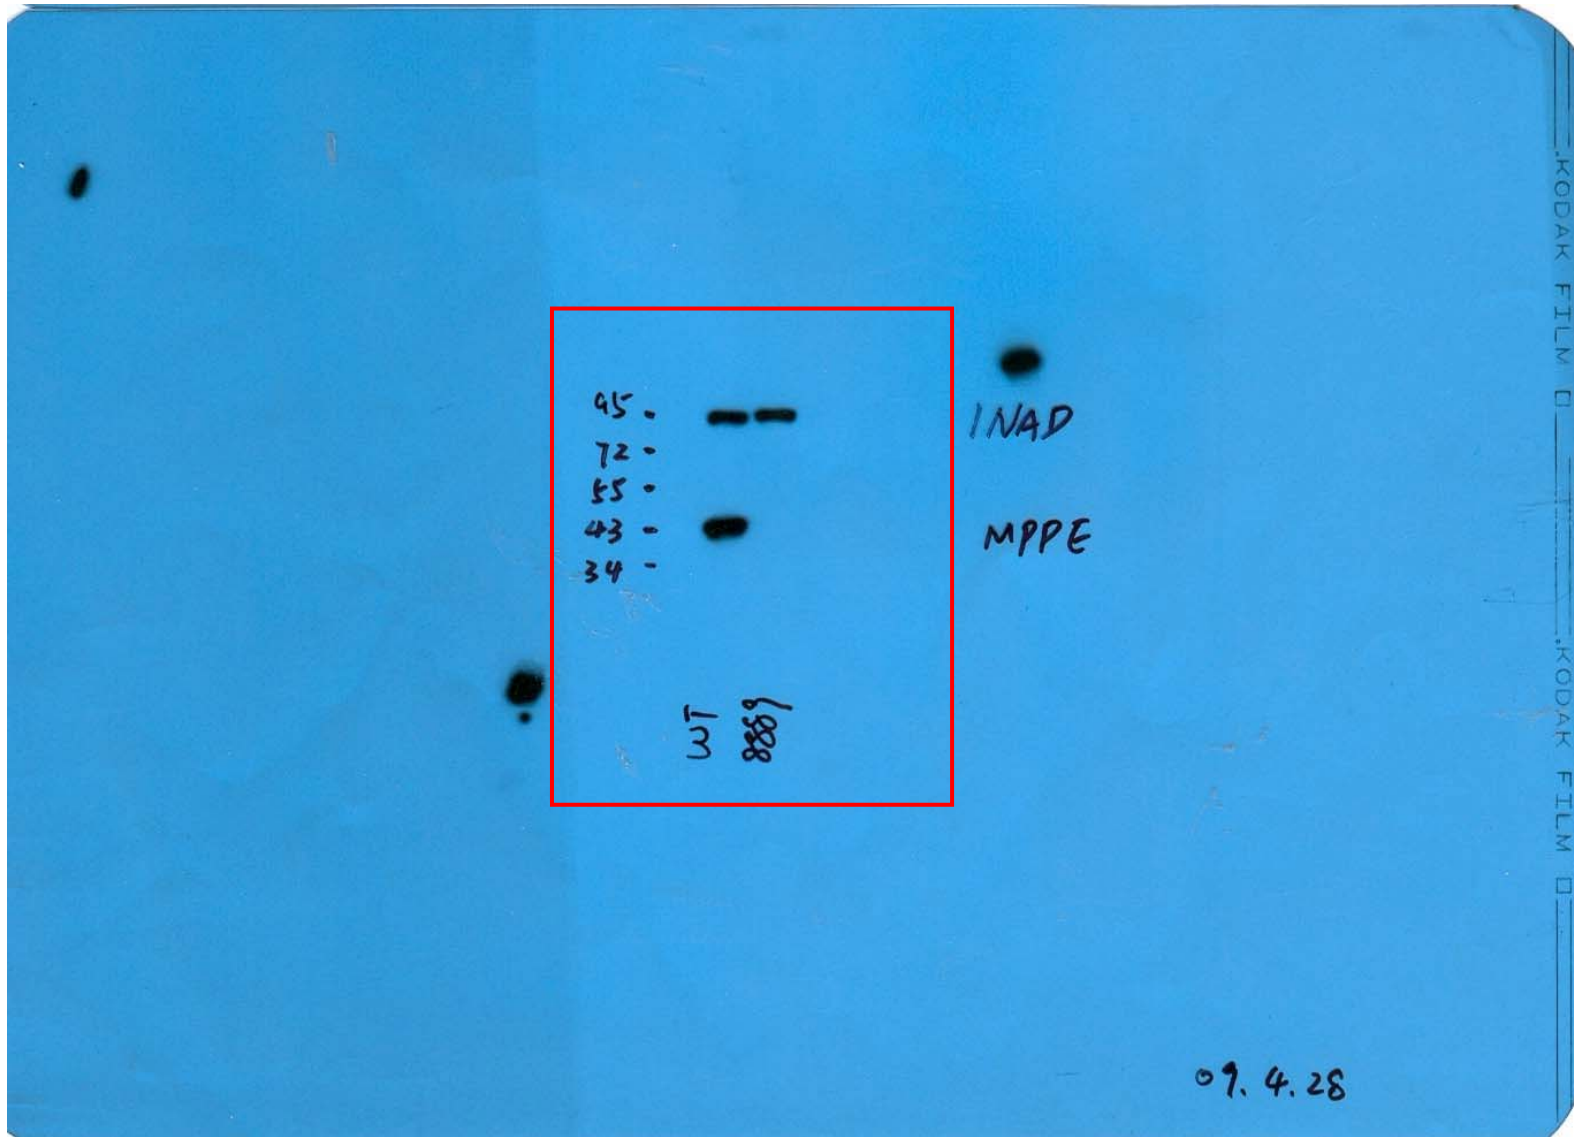



Fig 5E

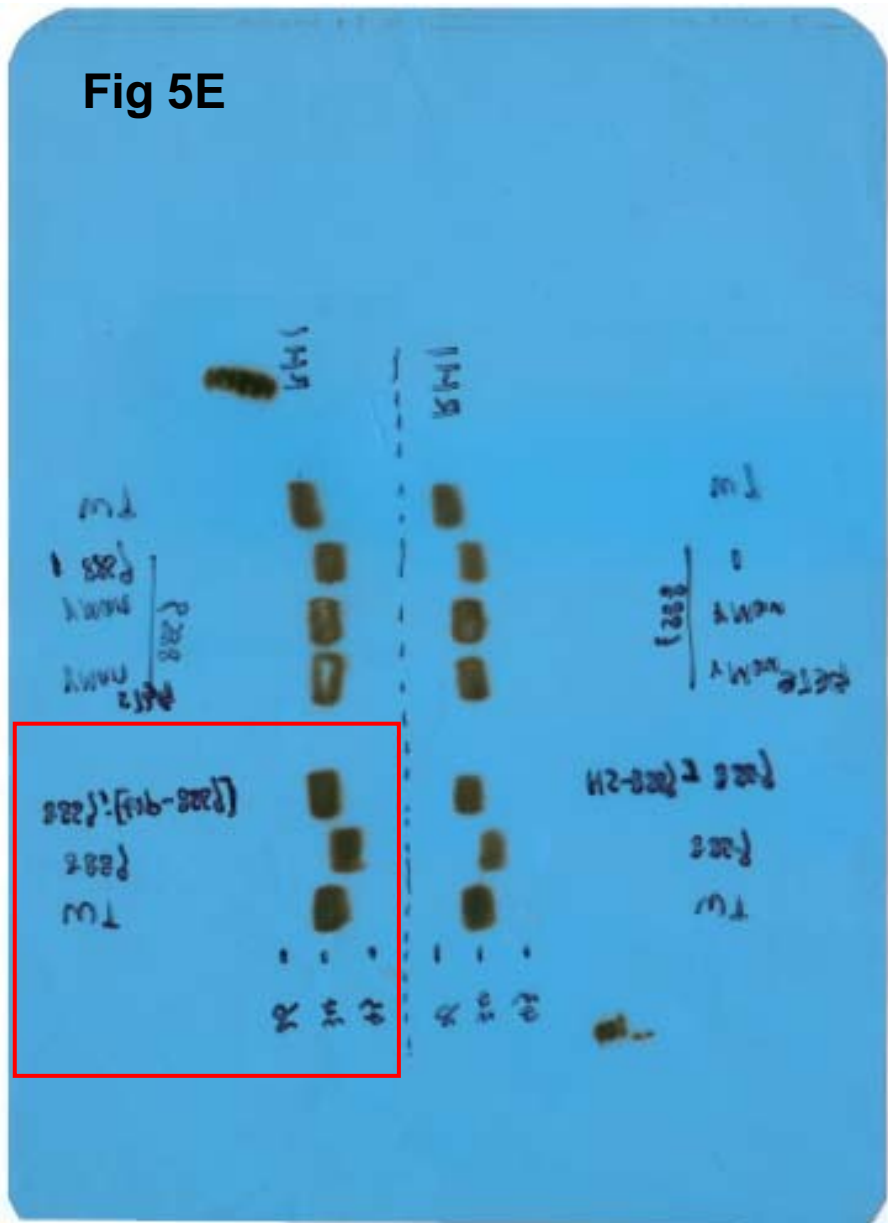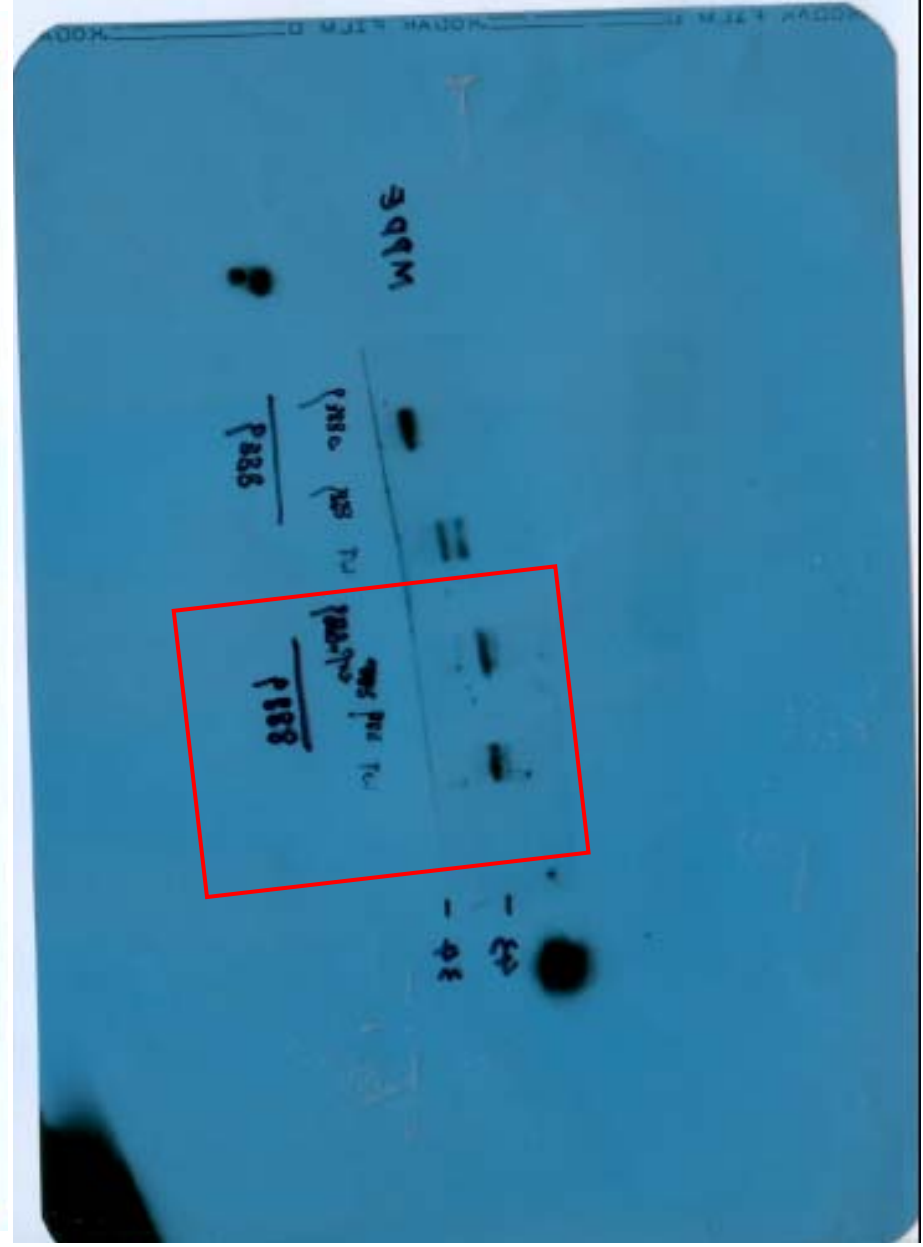

Fig 7A

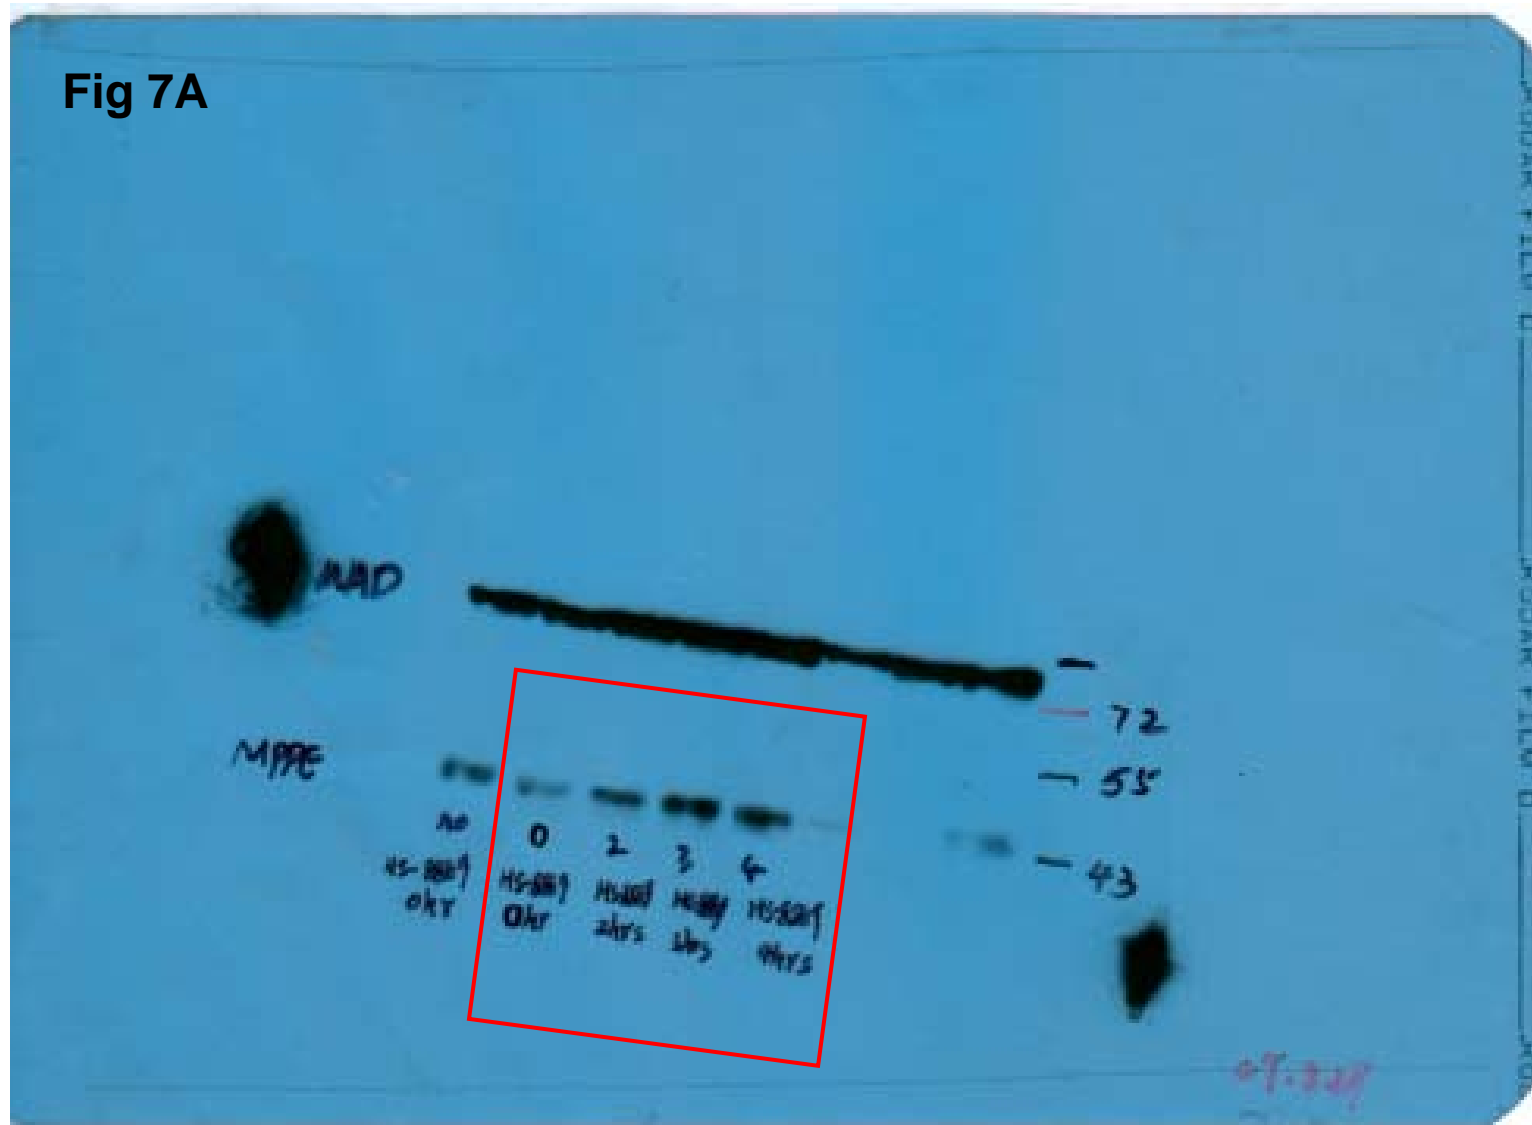

Fig 7D

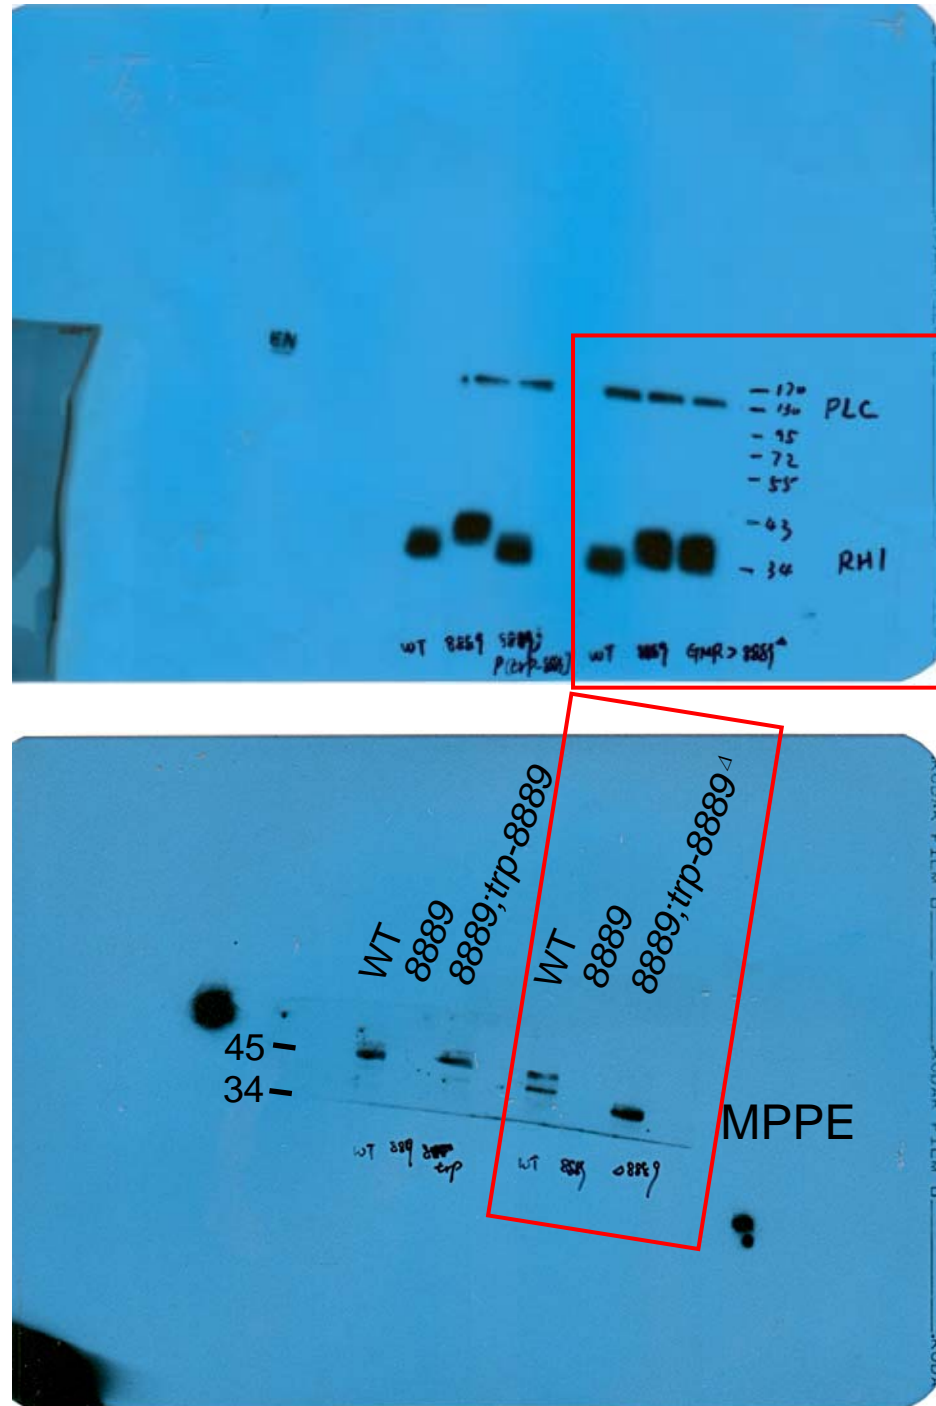



**Fig 8A**

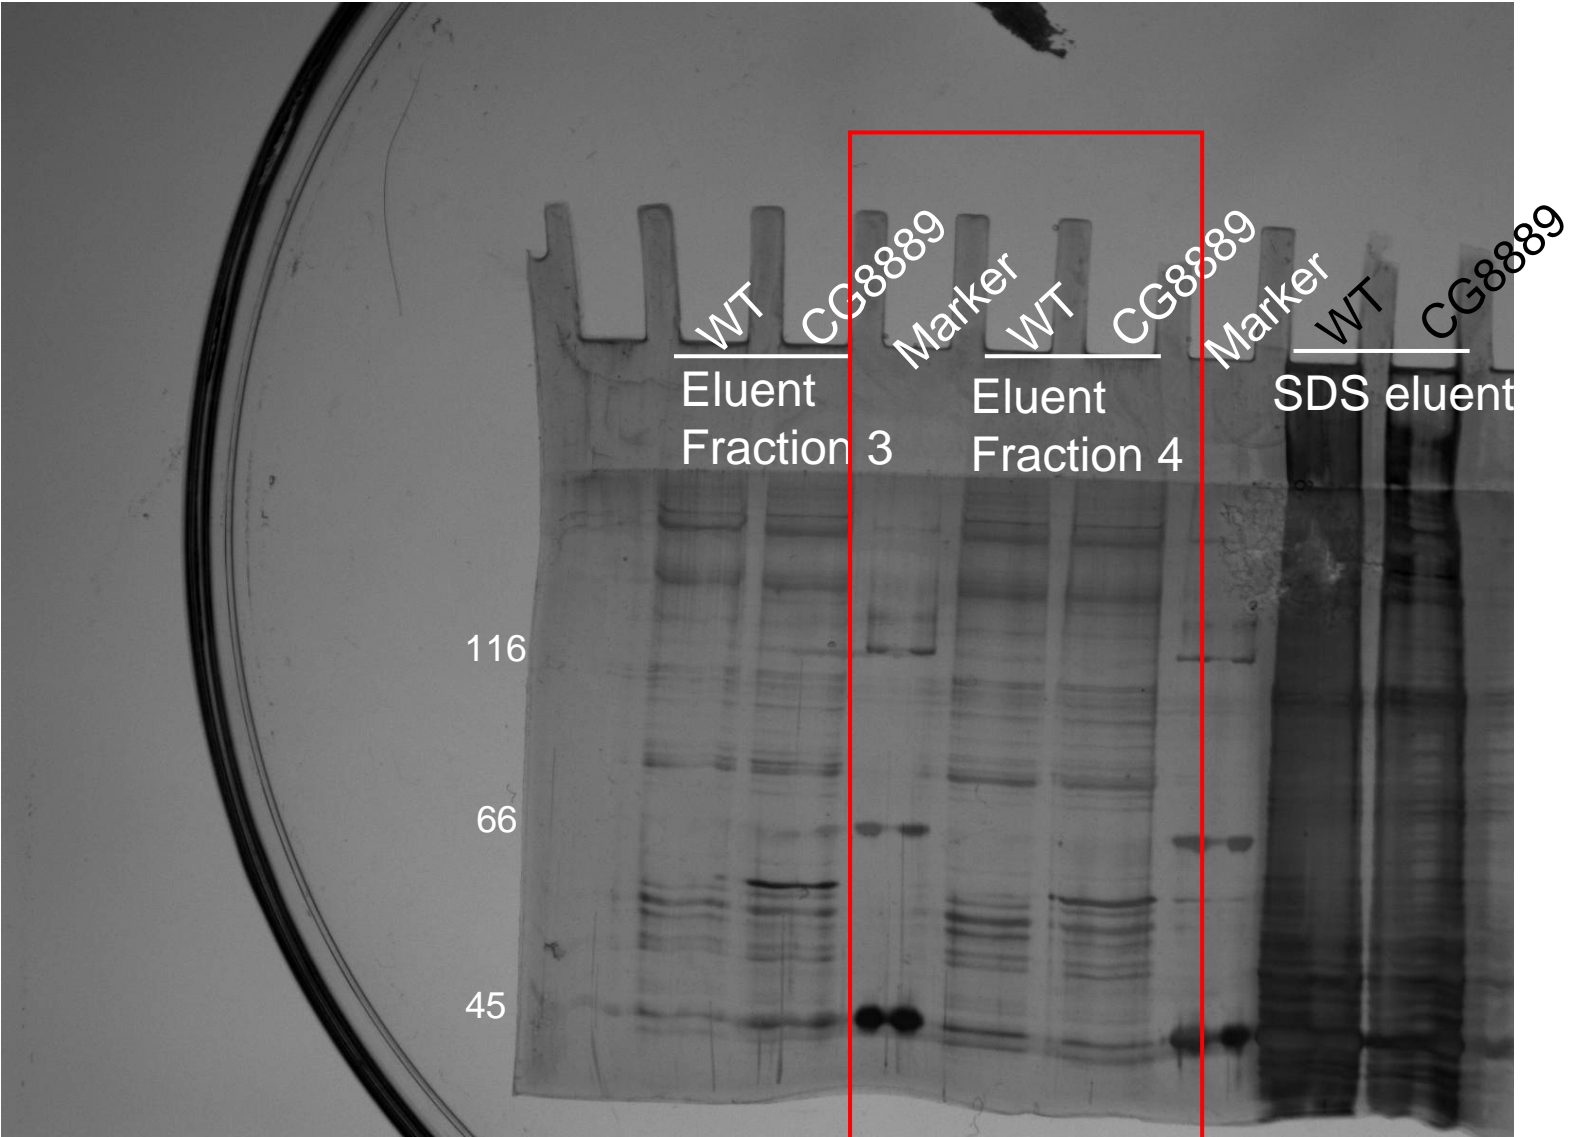

Fig 8B

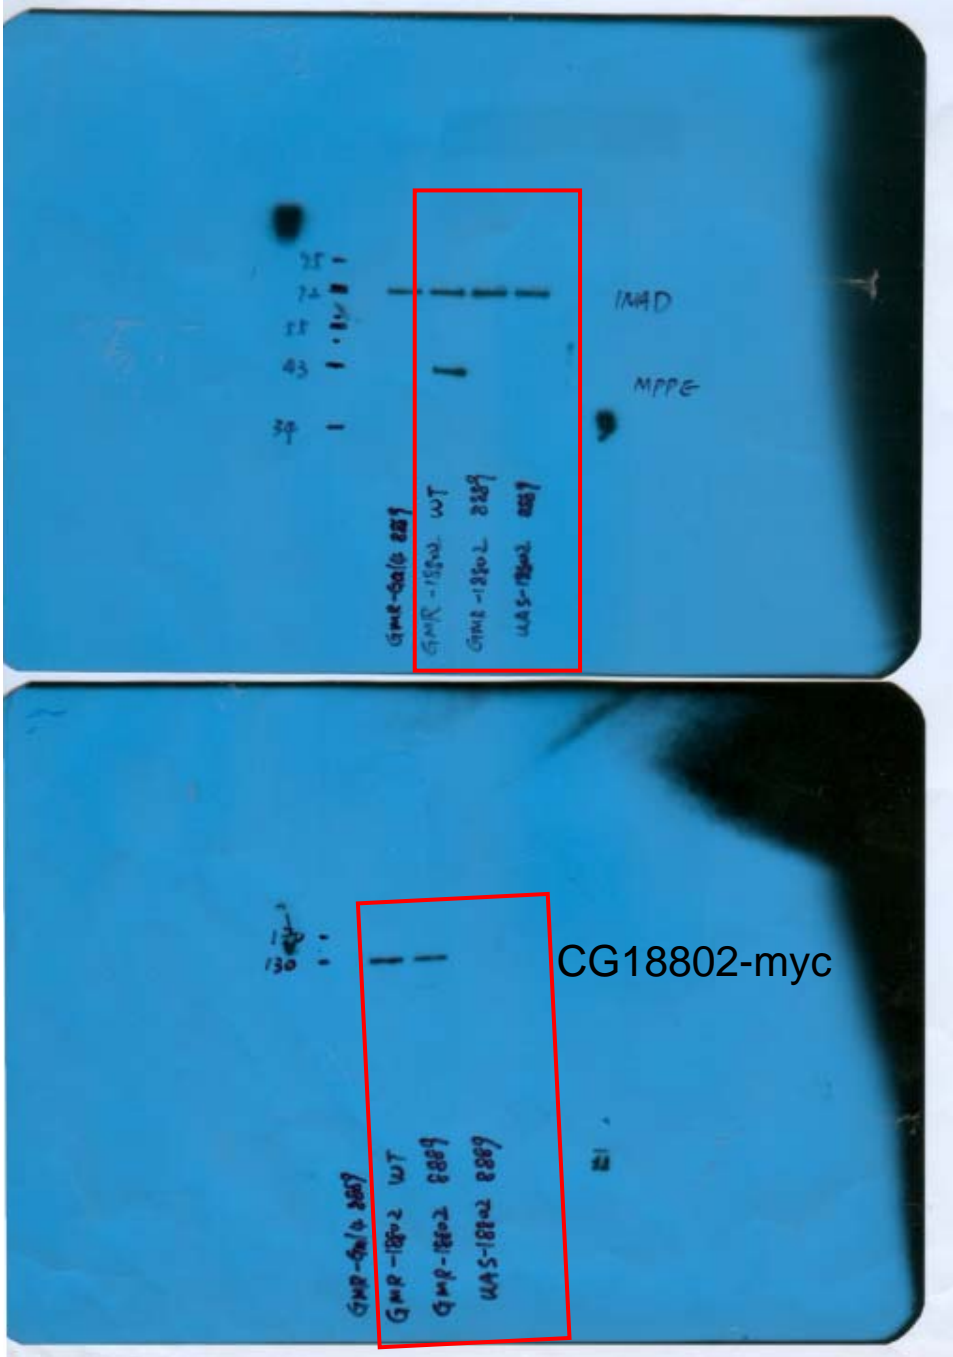

Fig 8D

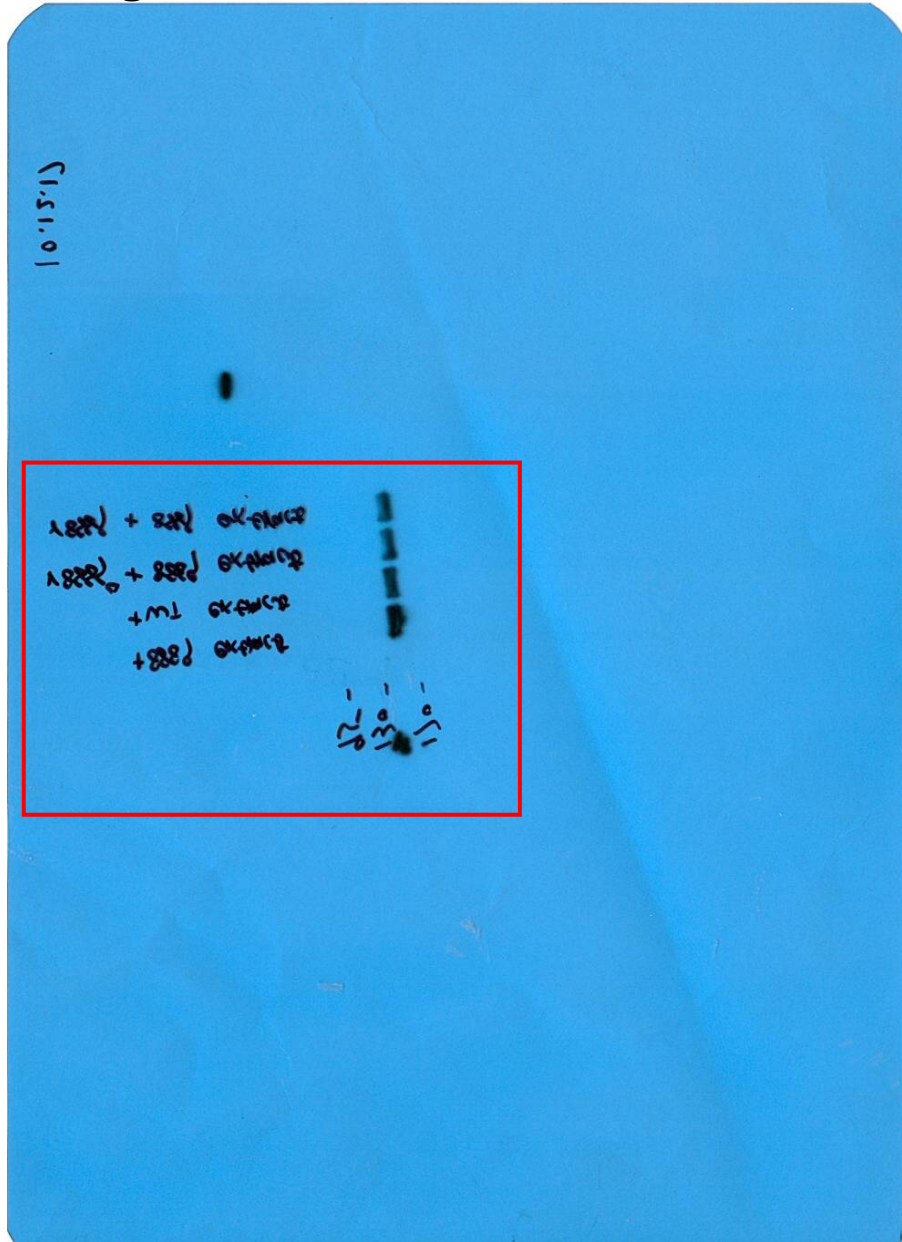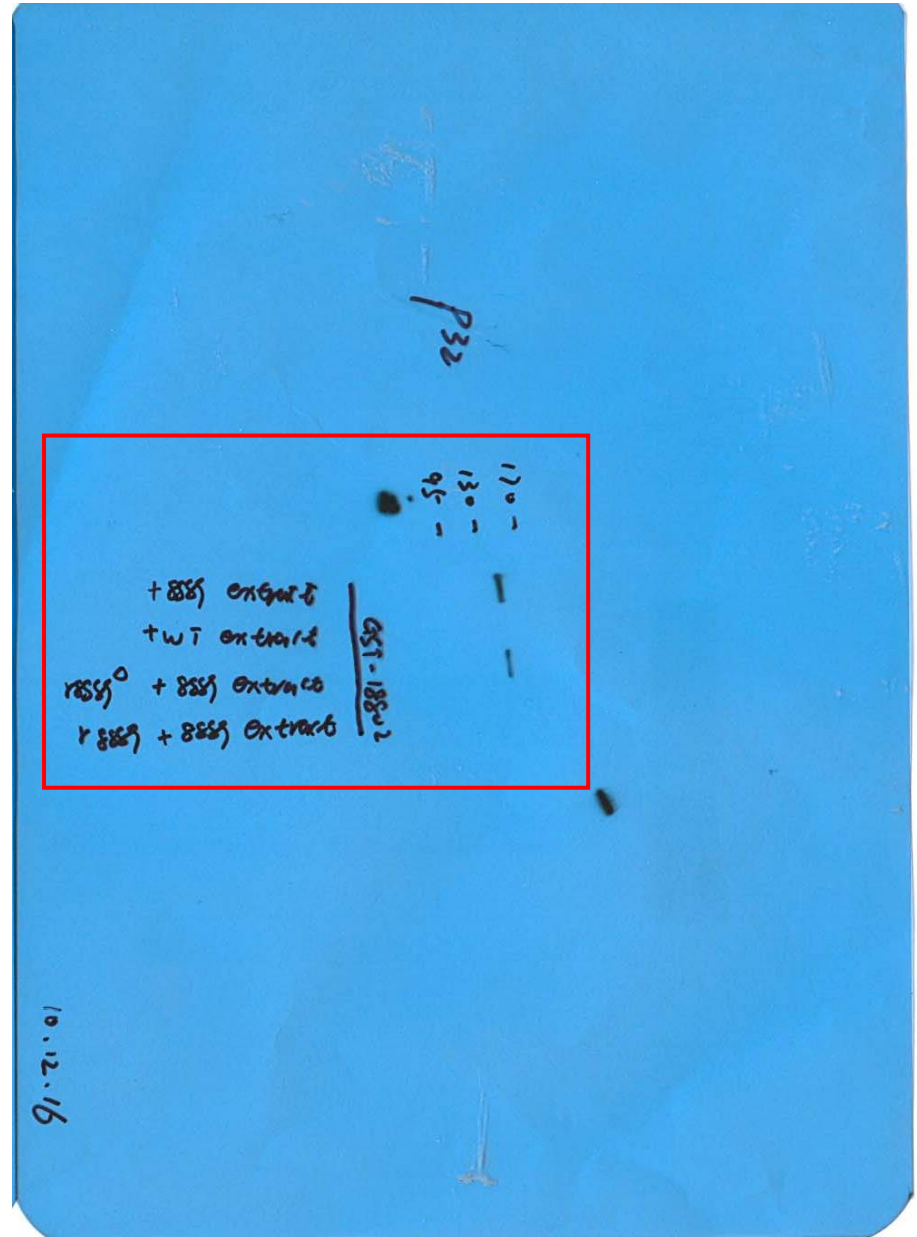

Fig 9A

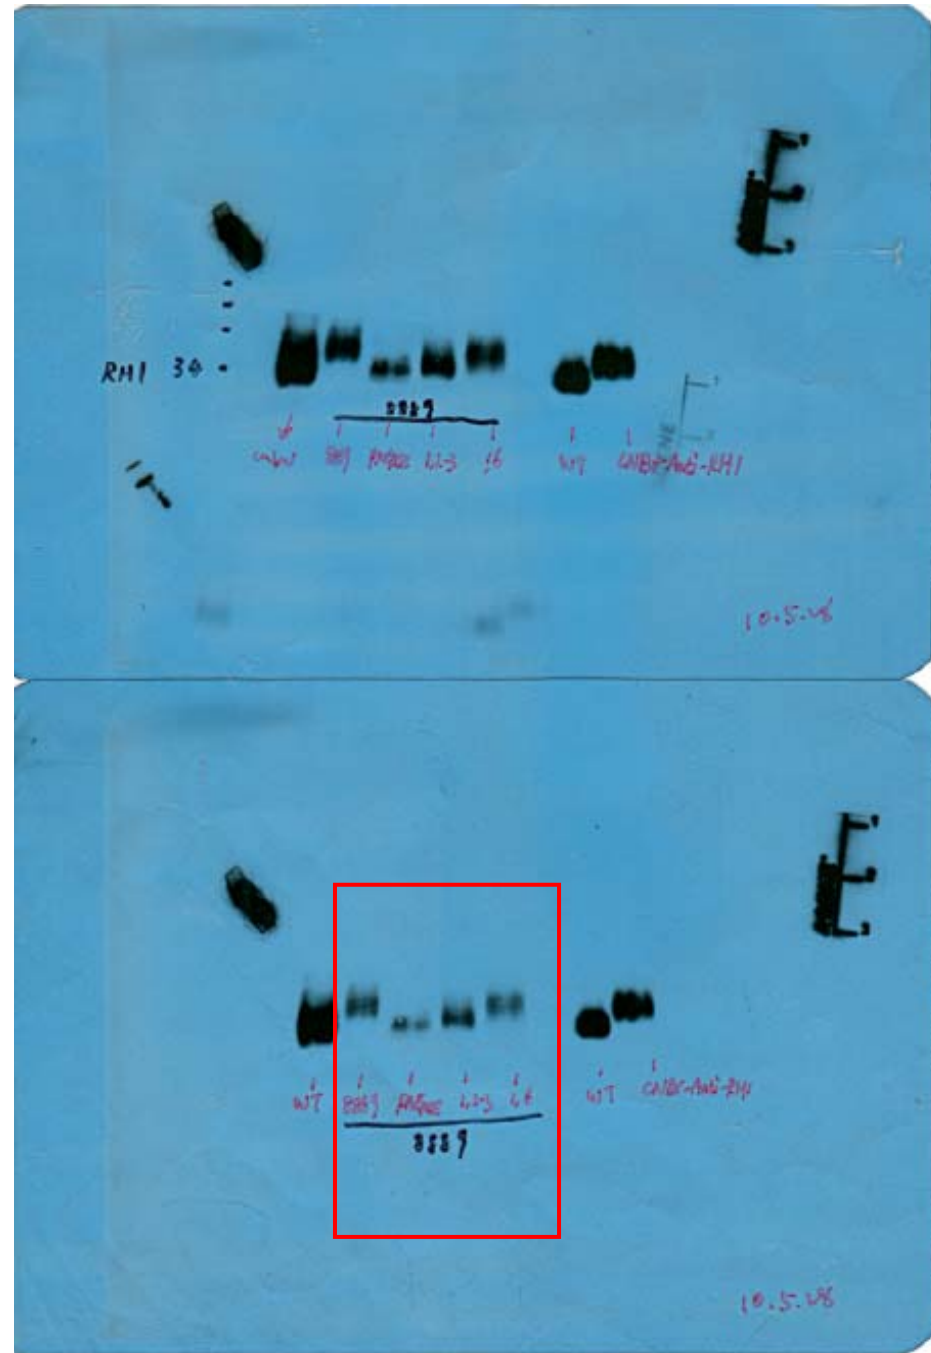

Fig 9B

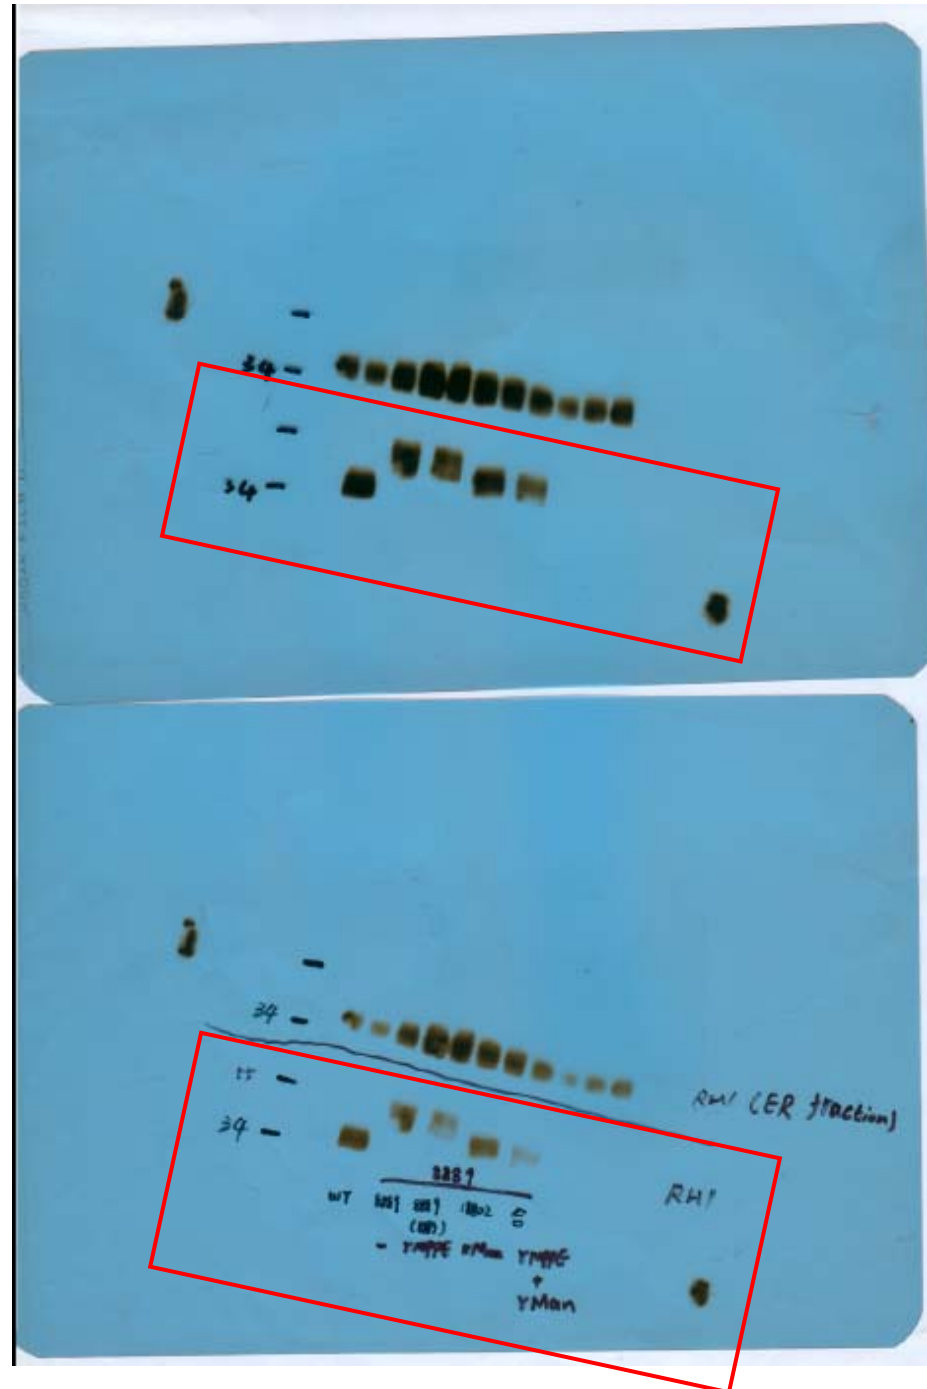

Fig 9C

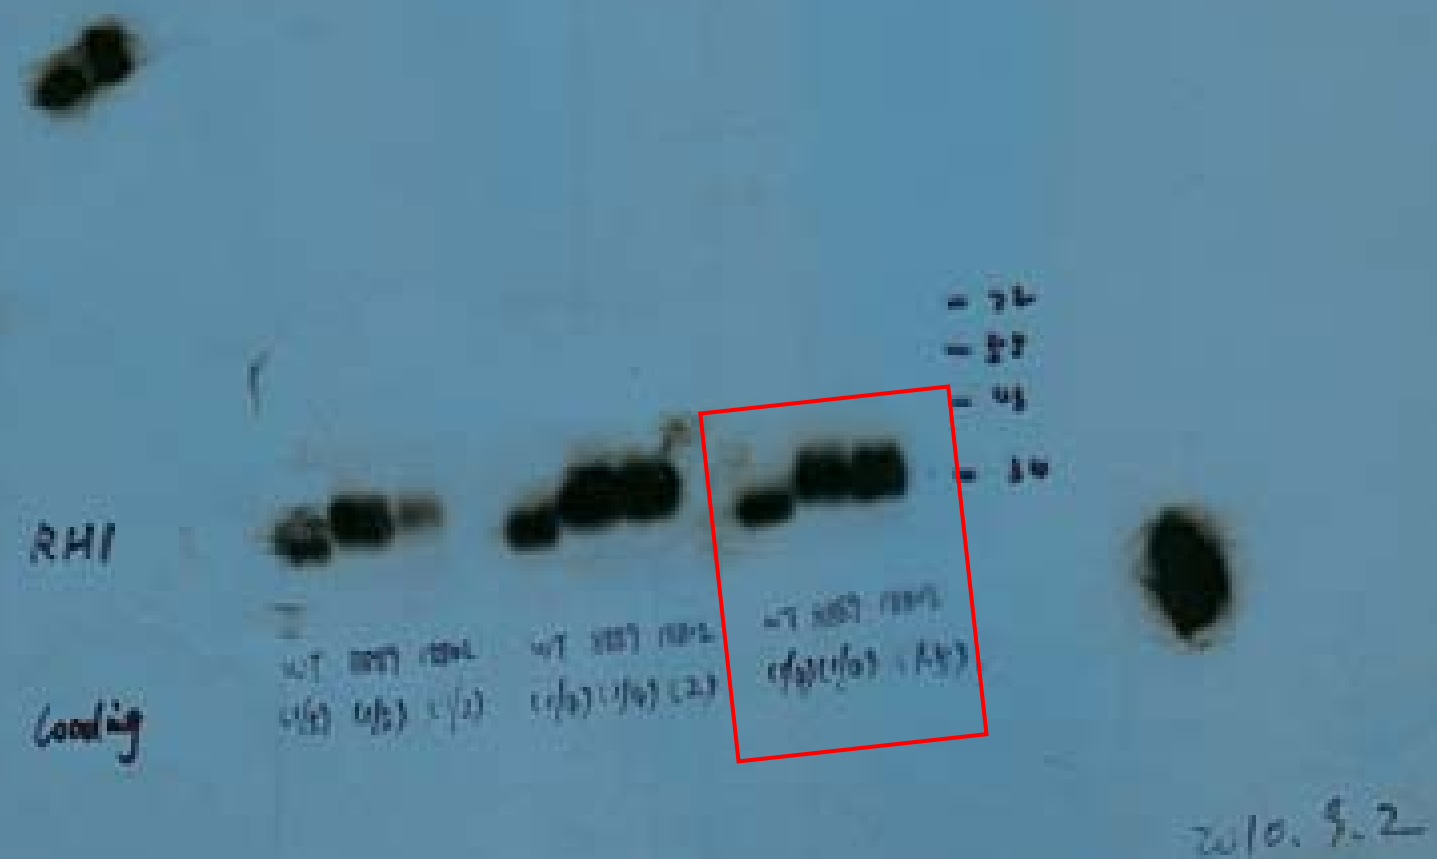

Supplement: emboj2011254s2.pdf [file emboj2011254s2.pdf]
